# Supplementary material
Source: bioRxiv or medRxiv preprint supplement (https://www.biorxiv.org/highwire/filestream/3302/field_highwire_adjunct_files/0/013110-1.zip)

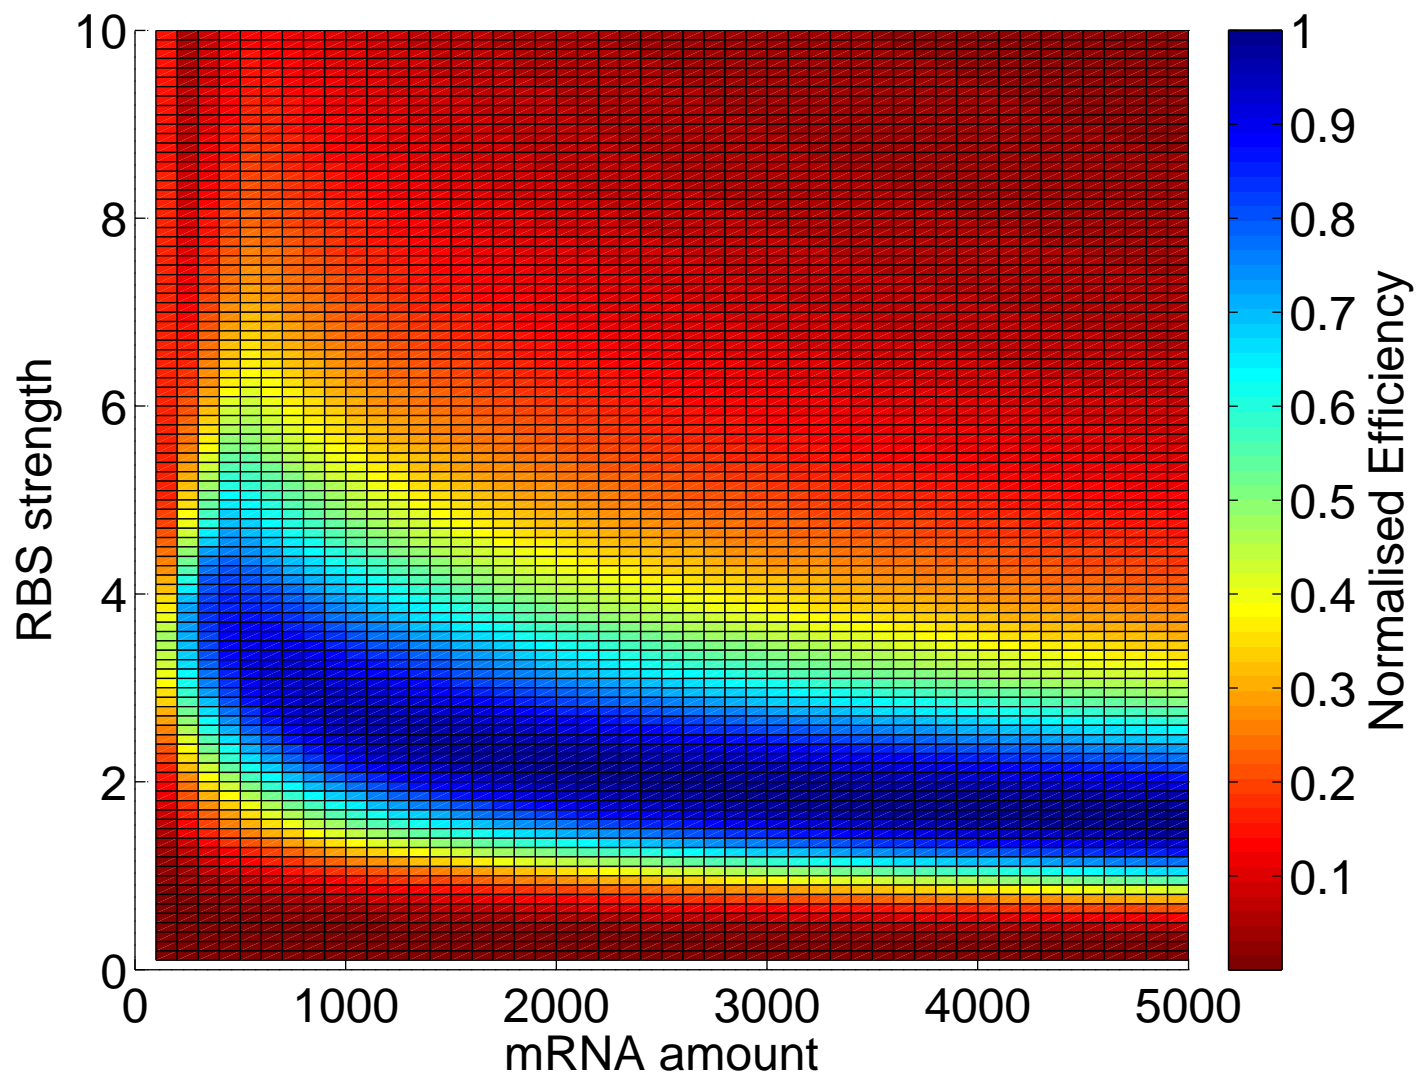

Supplement: Supplementary file [file 013110-1.zip]
